# Supplementary material for: Structures, luminescent and magnetic properties of a series of (3,6)-connected lanthanide–organic frameworks
Source: Royal Society of Chemistry journal article supplement (doi:10.1039/c3dt52305e), 2013-10-16
Supplement: c3dt52305e.pdf [file c3dt52305e.pdf]

Supporting Information for

## Structures, Luminescent and Magnetic Properties of a Series of (3,6)-connected Lanthanide-Organic Frameworks

Yin-Ling Hou,<sup>1,2</sup> Rui-Rui Cheng,<sup>1,2</sup> Gang Xiong,<sup>1,2</sup> Jian-Zhong Cui,<sup>2</sup> and Bin Zhao<sup>1,\*</sup>

<sup>1</sup> Key Laboratory of Advanced Energy Material Chemistry, MOE, and TKL of Metal and Molecule Based Material Chemistry, Tianjin Co-Innovation Center of Chemical Science and Engineering, Nankai University, Tianjin 300071, China.

<sup>2</sup> Department of Chemistry, Tianjin University, Tianjin, 300072, China.

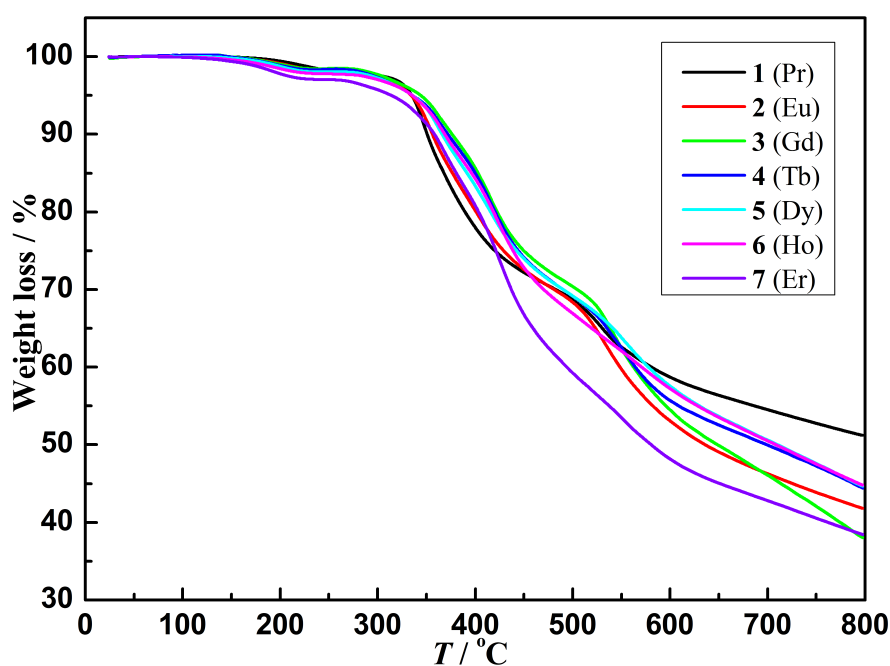

**Fig. S1** Thermogravimetric analyses (TGA) curves of compounds **1-7**.

\* Corresponding authors. E-mail: [zhaobin@nankai.edu.cn](mailto:zhaobin@nankai.edu.cn)

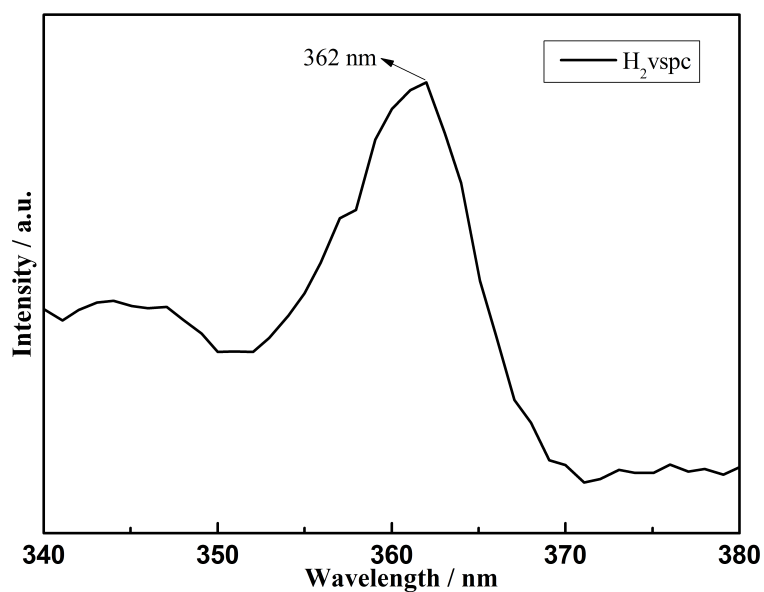

Fig. S2 The emission spectrum of the ligand H<sub>2</sub>vspc.

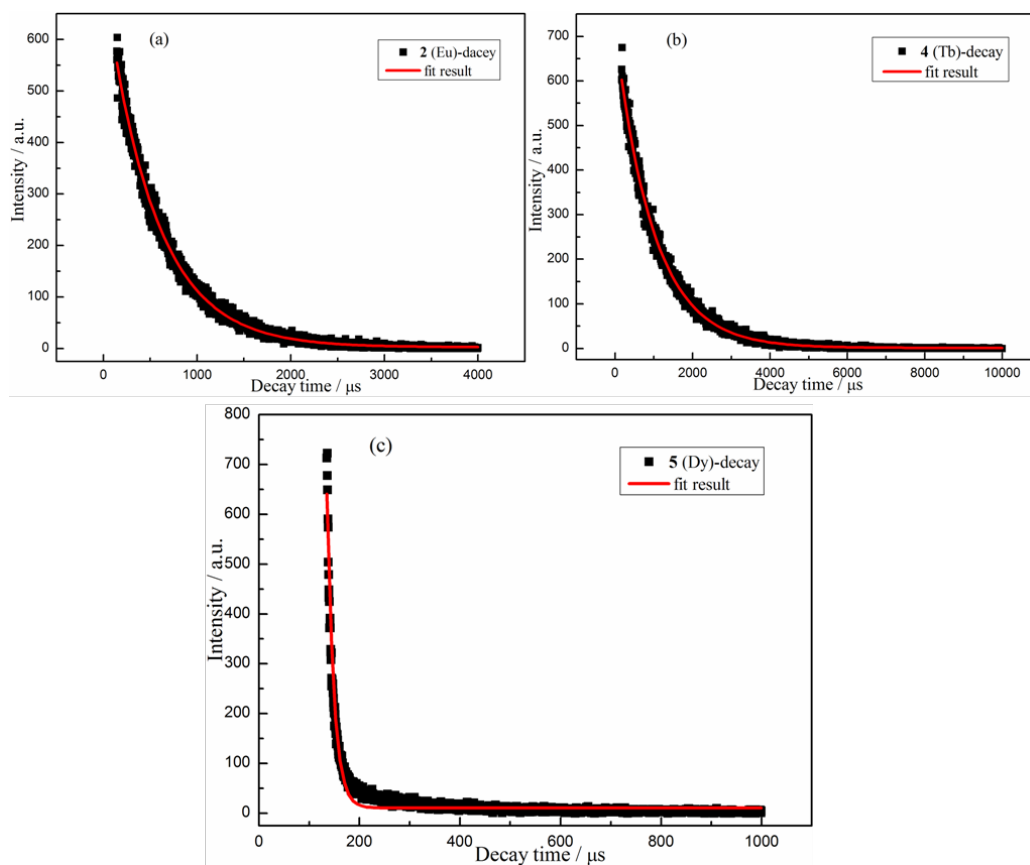

Fig. S3 Luminescence decay curves of 2 (a), 4 (b) and 5 (c).

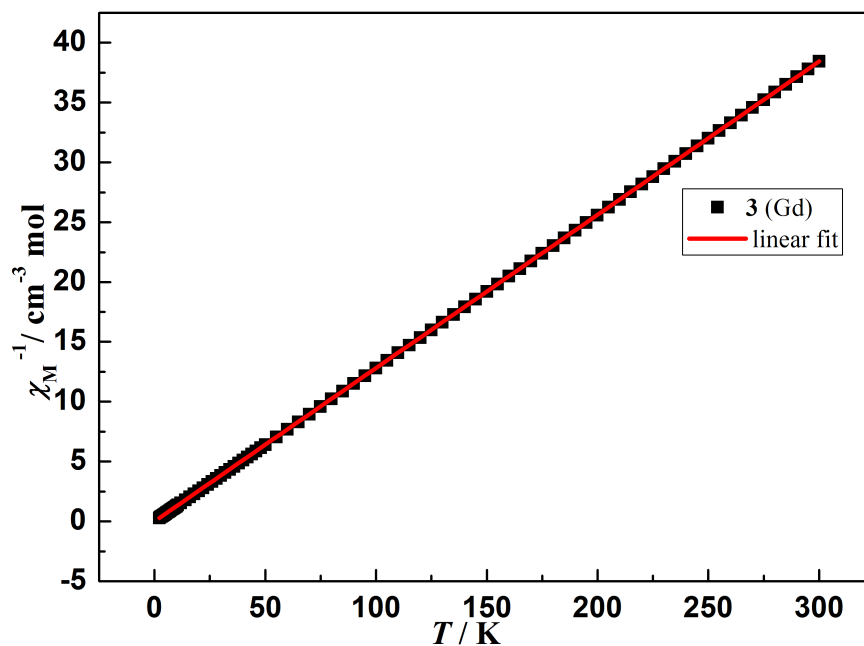

**Fig. S4** The  $\chi_M^{-1}$  versus  $T$  and the Curie-Weiss linear fit of **3**.

The data over the temperature range of 2-300 K of **3** fit well the Curie-Weiss law:  $\chi_M = C/(T-\theta)$  (Fig. S4), with Curie constant  $C = 7.82 \text{ cm}^3 \cdot \text{K} \cdot \text{mol}^{-1}$  and Weiss temperature  $\theta = -0.69 \text{ K}$ . The negative Weiss temperature  $\theta = -0.69 \text{ K}$  for **3** further supports the existence of antiferromagnetic coupling between  $\text{Gd}^{3+}$ .

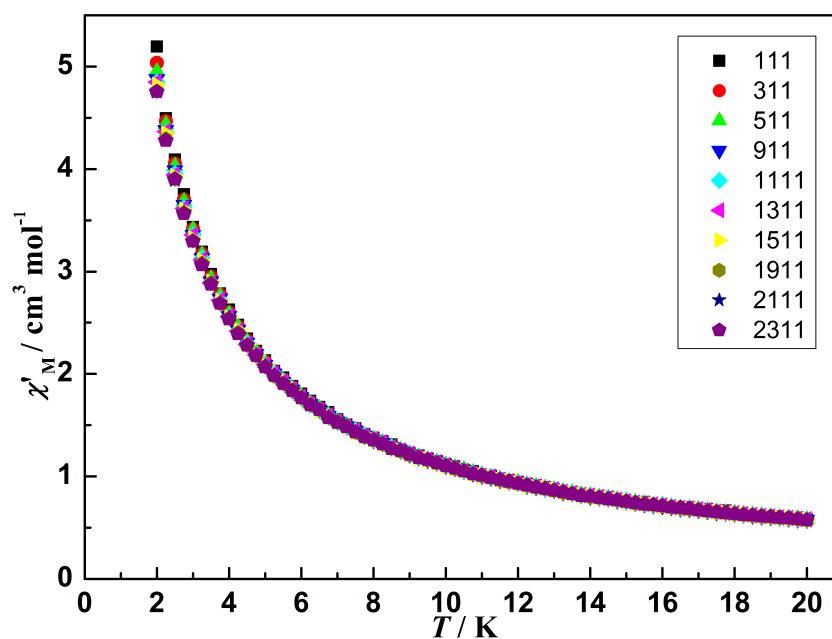

**Fig. S5** Plots of  $\chi_M'$  vs.  $T$  of **5** in a 30 Oe ac field at the indicated frequency.

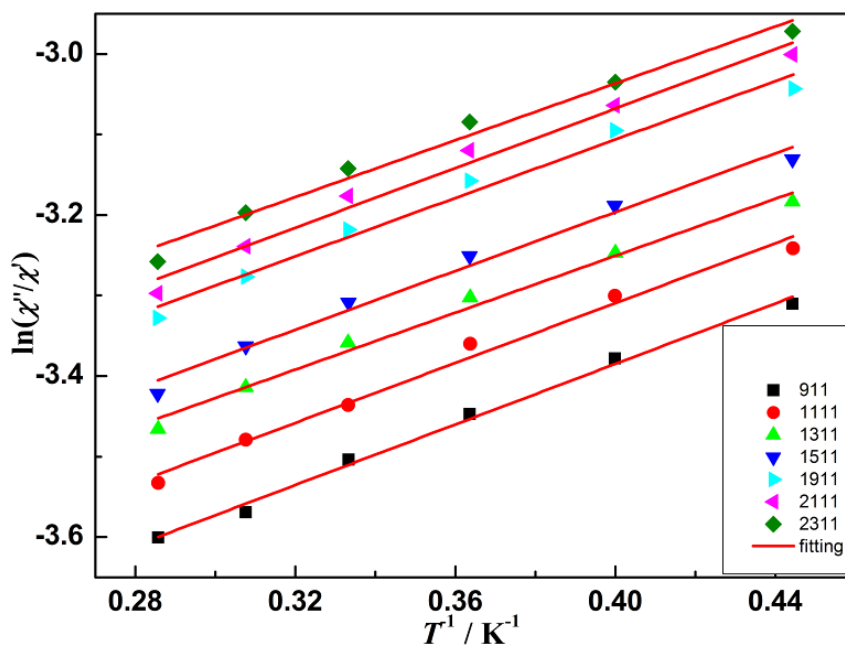

**Fig. S6** Plots of natural logarithm of  $\chi''/\chi'$  vs  $T^{-1}$  of 5; the solid lines represent the fitting in the range of 2.0-3.2 K.

**Table S1.** Selected Bond Lengths (Å) for Compounds 1-7

| Atom              | Atom            | Length/Å  | Atom | Atom             | Length/Å  |
|-------------------|-----------------|-----------|------|------------------|-----------|
| <b>Compound 1</b> |                 |           |      |                  |           |
| Pr1               | O1              | 2.508 (4) | Pr1  | O9 <sup>1</sup>  | 2.511 (4) |
| Pr1               | O2              | 2.438 (4) | Pr1  | O10              | 2.520 (4) |
| Pr1               | O3 <sup>6</sup> | 2.384 (5) | Pr1  | O16 <sup>5</sup> | 2.362 (5) |
| Pr1               | O8 <sup>1</sup> | 2.635 (4) | Pr1  | O17 <sup>4</sup> | 2.394 (4) |
| <b>Compound 2</b> |                 |           |      |                  |           |
| Eu1               | O1              | 2.453 (5) | Eu1  | O5 <sup>3</sup>  | 2.307 (5) |
| Eu1               | O2              | 2.367 (6) | Eu1  | O11 <sup>4</sup> | 2.463 (6) |
| Eu1               | O3 <sup>2</sup> | 2.326 (5) | Eu1  | O16 <sup>1</sup> | 2.468 (6) |
| Eu1               | O4              | 2.329 (6) | Eu1  | O17 <sup>1</sup> | 2.580 (6) |
| <b>Compound 3</b> |                 |           |      |                  |           |
| Gd1               | O1              | 2.443 (4) | Gd1  | O5 <sup>5</sup>  | 2.317 (4) |
| Gd1               | O2              | 2.450 (4) | Gd1  | O11 <sup>6</sup> | 2.471 (4) |
| Gd1               | O3              | 2.563 (4) | Gd1  | O16 <sup>7</sup> | 2.310 (4) |
| Gd1               | O4              | 2.287 (4) | Gd1  | O17 <sup>4</sup> | 2.354 (4) |
| <b>Compound 4</b> |                 |           |      |                  |           |
| Tb1               | O1              | 2.413 (4) | Tb1  | O9 <sup>2</sup>  | 2.341 (4) |
| Tb1               | O2              | 2.438 (4) | Tb1  | O10              | 2.269 (4) |

|                   |                 |           |     |                  |           |
|-------------------|-----------------|-----------|-----|------------------|-----------|
| Tb1               | O3              | 2.548 (5) | Tb1 | O11 <sup>6</sup> | 2.306 (4) |
| Tb1               | O8 <sup>5</sup> | 2.288 (5) | Tb1 | O18 <sup>7</sup> | 2.454 (5) |
| <b>Compound 5</b> |                 |           |     |                  |           |
| Dy1               | O1              | 2.283 (4) | Dy1 | O9 <sup>2</sup>  | 2.538 (4) |
| Dy1               | O2              | 2.409 (5) | Dy1 | O10 <sup>2</sup> | 2.430 (4) |
| Dy1               | O3              | 2.323 (5) | Dy1 | O11              | 2.255 (5) |
| Dy1               | O4 <sup>4</sup> | 2.283 (5) | Dy1 | O16 <sup>5</sup> | 2.438 (5) |
| <b>Compound 6</b> |                 |           |     |                  |           |
| Ho1               | O1              | 2.306 (7) | Ho1 | O5               | 2.247 (7) |
| Ho1               | O2              | 2.381 (7) | Ho1 | O11 <sup>4</sup> | 2.257 (7) |
| Ho1               | O3              | 2.424 (8) | Ho1 | O16 <sup>3</sup> | 2.527 (8) |
| Ho1               | O4              | 2.266 (7) | Ho1 | O17 <sup>3</sup> | 2.438 (7) |
| <b>Compound 7</b> |                 |           |     |                  |           |
| Er1               | O1              | 2.239 (8) | Er1 | O5               | 2.521 (8) |
| Er1               | O2              | 2.419 (8) | Er1 | O6               | 2.400 (7) |
| Er1               | O3              | 2.258 (6) | Er1 | O11 <sup>6</sup> | 2.234 (8) |
| Er1               | O4              | 2.369 (8) | Er1 | O12 <sup>5</sup> | 2.288 (6) |

**Table S2.** Selected Bond Angles (deg) for Compounds 1-7

| Atom              | Atom | Atom             | Angle/°     | Atom             | Atom | Atom             | Angle/°     |
|-------------------|------|------------------|-------------|------------------|------|------------------|-------------|
| <b>Compound 1</b> |      |                  |             |                  |      |                  |             |
| O16 <sup>5</sup>  | Pr1  | O2               | 106.77 (15) | O3 <sup>6</sup>  | Pr1  | O2               | 89.65 (15)  |
| O16 <sup>5</sup>  | Pr1  | O8 <sup>1</sup>  | 73.88 (15)  | O3 <sup>6</sup>  | Pr1  | O8 <sup>1</sup>  | 69.37 (15)  |
| O16 <sup>5</sup>  | Pr1  | O10              | 74.71 (15)  | O3 <sup>6</sup>  | Pr1  | O10              | 141.98 (16) |
| O16 <sup>5</sup>  | Pr1  | O3 <sup>6</sup>  | 142.77 (16) | O3 <sup>6</sup>  | Pr1  | O9 <sup>1</sup>  | 77.69 (15)  |
| O16 <sup>5</sup>  | Pr1  | O9 <sup>1</sup>  | 74.65 (14)  | O1               | Pr1  | O8 <sup>1</sup>  | 136.32 (15) |
| O16 <sup>5</sup>  | Pr1  | O1               | 146.70 (15) | O1               | Pr1  | O10              | 72.07 (15)  |
| O16 <sup>5</sup>  | Pr1  | O17 <sup>4</sup> | 80.93 (14)  | O1               | Pr1  | O9 <sup>1</sup>  | 132.31 (14) |
| O2                | Pr1  | O8 <sup>1</sup>  | 124.66 (14) | O17 <sup>4</sup> | Pr1  | O2               | 155.89 (16) |
| O2                | Pr1  | O10              | 80.92 (14)  | O17 <sup>4</sup> | Pr1  | O8 <sup>1</sup>  | 79.29 (14)  |
| O2                | Pr1  | O9 <sup>1</sup>  | 75.54 (14)  | O17 <sup>4</sup> | Pr1  | O10              | 79.20 (15)  |
| O2                | Pr1  | O1               | 70.19 (15)  | O17 <sup>4</sup> | Pr1  | O9 <sup>1</sup>  | 128.44 (14) |
| O9 <sup>1</sup>   | Pr1  | O8 <sup>1</sup>  | 50.65 (12)  | O17 <sup>4</sup> | Pr1  | O1               | 90.69 (14)  |
| O9 <sup>1</sup>   | Pr1  | O10              | 133.54 (14) | O10              | Pr1  | O8 <sup>1</sup>  | 144.19 (15) |
| <b>Compound 2</b> |      |                  |             |                  |      |                  |             |
| O5 <sup>3</sup>   | Eu1  | O17 <sup>1</sup> | 73.79 (19)  | O11 <sup>4</sup> | Eu1  | O17 <sup>1</sup> | 143.31 (19) |

|                  |     |                  |            |                  |     |                  |             |
|------------------|-----|------------------|------------|------------------|-----|------------------|-------------|
| O5 <sup>3</sup>  | Eu1 | O3 <sup>2</sup>  | 142.9 (2)  | O11 <sup>4</sup> | Eu1 | O16 <sup>1</sup> | 133.08 (19) |
| O5 <sup>3</sup>  | Eu1 | O16 <sup>1</sup> | 75.28 (19) | O4               | Eu1 | O17 <sup>1</sup> | 78.9 (2)    |
| O5 <sup>3</sup>  | Eu1 | O11 <sup>4</sup> | 74.1 (2)   | O4               | Eu1 | O16 <sup>1</sup> | 129.7 (2)   |
| O5 <sup>3</sup>  | Eu1 | O4               | 82.0 (2)   | O4               | Eu1 | O11 <sup>4</sup> | 79.5 (2)    |
| O5 <sup>3</sup>  | Eu1 | O2               | 105.2 (2)  | O4               | Eu1 | O2               | 154.9 (2)   |
| O5 <sup>3</sup>  | Eu1 | O1               | 145.5 (2)  | O4               | Eu1 | O1               | 88.8 (2)    |
| O3 <sup>2</sup>  | Eu1 | O17 <sup>1</sup> | 69.7 (2)   | O2               | Eu1 | O17 <sup>1</sup> | 126.1 (2)   |
| O3 <sup>2</sup>  | Eu1 | O16 <sup>1</sup> | 77.2 (2)   | O2               | Eu1 | O16 <sup>1</sup> | 75.2 (2)    |
| O3 <sup>2</sup>  | Eu1 | O11 <sup>4</sup> | 142.6 (2)  | O2               | Eu1 | O11 <sup>4</sup> | 79.6 (2)    |
| O3 <sup>2</sup>  | Eu1 | O4               | 97.2 (2)   | O2               | Eu1 | O1               | 71.6 (2)    |
| O3 <sup>2</sup>  | Eu1 | O2               | 91.1 (2)   | O1               | Eu1 | O17 <sup>1</sup> | 136.87 (19) |
| O3 <sup>2</sup>  | Eu1 | O1               | 71.2 (2)   | O1               | Eu1 | O16 <sup>1</sup> | 132.91 (19) |
| O16 <sup>1</sup> | Eu1 | O17 <sup>1</sup> | 51.9 (2)   | O1               | Eu1 | O11 <sup>4</sup> | 71.50 (19)  |

### Compound 3

|                  |     |                  |             |                  |     |                  |             |
|------------------|-----|------------------|-------------|------------------|-----|------------------|-------------|
| O5 <sup>5</sup>  | Gd1 | O1               | 87.65 (15)  | O16 <sup>7</sup> | Gd1 | O5 <sup>5</sup>  | 96.44 (14)  |
| O5 <sup>5</sup>  | Gd1 | O2               | 130.00 (14) | O16 <sup>7</sup> | Gd1 | O1               | 71.33 (16)  |
| O5 <sup>5</sup>  | Gd1 | O11 <sup>6</sup> | 79.25 (15)  | O16 <sup>7</sup> | Gd1 | O2               | 77.63 (15)  |
| O5 <sup>5</sup>  | Gd1 | O3               | 79.12 (14)  | O16 <sup>7</sup> | Gd1 | O11 <sup>6</sup> | 142.22 (17) |
| O5 <sup>5</sup>  | Gd1 | O17 <sup>4</sup> | 154.31 (16) | O16 <sup>7</sup> | Gd1 | O3               | 69.60 (15)  |
| O1               | Gd1 | O2               | 133.65 (15) | O16 <sup>7</sup> | Gd1 | O17 <sup>4</sup> | 92.49 (14)  |
| O1               | Gd1 | O11 <sup>6</sup> | 71.00 (16)  | O4               | Gd1 | O5 <sup>5</sup>  | 82.58 (14)  |
| O1               | Gd1 | O3               | 136.78 (14) | O4               | Gd1 | O1               | 144.66 (16) |
| O2               | Gd1 | O11 <sup>6</sup> | 133.29 (13) | O4               | Gd1 | O2               | 75.44 (15)  |
| O2               | Gd1 | O3               | 51.99 (12)  | O4               | Gd1 | O11 <sup>6</sup> | 73.82 (16)  |
| O17 <sup>4</sup> | Gd1 | O1               | 72.47 (14)  | O4               | Gd1 | O3               | 74.35 (15)  |
| O17 <sup>4</sup> | Gd1 | O2               | 75.46 (14)  | O4               | Gd1 | O16 <sup>7</sup> | 143.40 (17) |
| O17 <sup>4</sup> | Gd1 | O11 <sup>6</sup> | 78.96 (14)  | O4               | Gd1 | O17 <sup>4</sup> | 104.12 (14) |
| O17 <sup>4</sup> | Gd1 | O3               | 126.54 (14) | O11 <sup>6</sup> | Gd1 | O3               | 143.37 (15) |

### Compound 4

|                 |     |                  |             |                 |     |                  |             |
|-----------------|-----|------------------|-------------|-----------------|-----|------------------|-------------|
| O1              | Tb1 | O2               | 133.21 (15) | O9 <sup>2</sup> | Tb1 | O3               | 126.31 (16) |
| O1              | Tb1 | O3               | 136.76 (15) | O9 <sup>2</sup> | Tb1 | O18 <sup>5</sup> | 79.40 (16)  |
| O1              | Tb1 | O18 <sup>5</sup> | 71.30 (16)  | O10             | Tb1 | O1               | 145.18 (17) |
| O2              | Tb1 | C1               | 26.23 (16)  | O10             | Tb1 | O2               | 75.35 (16)  |
| O2              | Tb1 | O3               | 52.25 (14)  | O10             | Tb1 | O3               | 73.92 (16)  |
| O2              | Tb1 | O18 <sup>5</sup> | 133.09 (14) | O10             | Tb1 | O8 <sup>6</sup>  | 142.83 (18) |
| O8 <sup>6</sup> | Tb1 | O1               | 71.47 (17)  | O10             | Tb1 | O9 <sup>2</sup>  | 104.67 (16) |
| O8 <sup>6</sup> | Tb1 | O2               | 77.00 (16)  | O10             | Tb1 | O11 <sup>7</sup> | 82.52 (15)  |

|                 |     |                  |             |                  |     |                  |             |
|-----------------|-----|------------------|-------------|------------------|-----|------------------|-------------|
| O8 <sup>6</sup> | Tb1 | O3               | 69.58 (17)  | O10              | Tb1 | O18 <sup>5</sup> | 74.05 (16)  |
| O8 <sup>6</sup> | Tb1 | O9 <sup>2</sup>  | 91.52 (16)  | O11 <sup>7</sup> | Tb1 | O1               | 87.86 (16)  |
| O8 <sup>6</sup> | Tb1 | O11 <sup>7</sup> | 97.09 (16)  | O11 <sup>7</sup> | Tb1 | O2               | 130.23 (16) |
| O8 <sup>6</sup> | Tb1 | O18 <sup>5</sup> | 142.70 (17) | O11 <sup>7</sup> | Tb1 | O3               | 79.06 (16)  |
| O8 <sup>6</sup> | Tb1 | O1               | 71.47 (17)  | O11 <sup>7</sup> | Tb1 | O9 <sup>2</sup>  | 154.57 (18) |
| O9 <sup>2</sup> | Tb1 | O1               | 72.25 (16)  | O11 <sup>7</sup> | Tb1 | O18 <sup>5</sup> | 79.29 (16)  |
| O9 <sup>2</sup> | Tb1 | O2               | 75.01 (16)  | O18 <sup>5</sup> | Tb1 | O3               | 143.21 (15) |

**Compound 5**

|                  |     |                  |                  |                 |     |                  |             |
|------------------|-----|------------------|------------------|-----------------|-----|------------------|-------------|
| O16 <sup>5</sup> | Dy1 | O9 <sup>2</sup>  | O16 <sup>5</sup> | O1              | Dy1 | O16 <sup>5</sup> | 79.31 (16)  |
| O11              | Dy1 | O16 <sup>5</sup> | 73.86 (17)       | O1              | Dy1 | O10 <sup>2</sup> | 130.37 (15) |
| O11              | Dy1 | O10 <sup>2</sup> | 75.16 (16)       | O1              | Dy1 | O3               | 154.33 (17) |
| O11              | Dy1 | O3               | 103.97 (17)      | O1              | Dy1 | O9 <sup>2</sup>  | 78.79 (15)  |
| O11              | Dy1 | O9 <sup>2</sup>  | 73.91 (17)       | O1              | Dy1 | O4 <sup>4</sup>  | 96.65 (17)  |
| O11              | Dy1 | O1               | 83.01 (17)       | O1              | Dy1 | O2               | 87.94 (16)  |
| O11              | Dy1 | O4 <sup>4</sup>  | 142.71 (18)      | O4 <sup>4</sup> | Dy1 | O16 <sup>5</sup> | 142.97 (17) |
| O11              | Dy1 | O2               | 145.78 (17)      | O4 <sup>4</sup> | Dy1 | O10 <sup>2</sup> | 77.12 (17)  |
| O10 <sup>2</sup> | Dy1 | O16 <sup>5</sup> | 132.93 (16)      | O4 <sup>4</sup> | Dy1 | O3               | 92.34 (17)  |
| O10 <sup>2</sup> | Dy1 | O9 <sup>2</sup>  | 52.61 (14)       | O4 <sup>4</sup> | Dy1 | O9 <sup>2</sup>  | 69.52 (17)  |
| O3               | Dy1 | O16 <sup>5</sup> | 79.06 (16)       | O4 <sup>4</sup> | Dy1 | O2               | 71.03 (17)  |
| O3               | Dy1 | O10 <sup>2</sup> | 75.09 (16)       | O2              | Dy1 | O16 <sup>5</sup> | 72.04 (17)  |
| O3               | Dy1 | O9 <sup>2</sup>  | 126.85 (16)      | O2              | Dy1 | O10 <sup>2</sup> | 132.72 (16) |
| O3               | Dy1 | O2               | 72.33 (17)       | O2              | Dy1 | O9 <sup>2</sup>  | 136.34 (17) |

**Compound 6**

|    |     |                  |           |                  |     |                  |           |
|----|-----|------------------|-----------|------------------|-----|------------------|-----------|
| O1 | Ho1 | O2               | 73.0 (3)  | O5               | Ho1 | O1               | 103.6 (3) |
| O1 | Ho1 | O3               | 78.5 (3)  | O5               | Ho1 | O2               | 145.1 (3) |
| O1 | Ho1 | O16 <sup>3</sup> | 126.9 (3) | O5               | Ho1 | O3               | 73.7 (3)  |
| O1 | Ho1 | O17 <sup>3</sup> | 74.8 (3)  | O5               | Ho1 | O4               | 82.7 (3)  |
| O2 | Ho1 | O3               | 71.6 (3)  | O5               | Ho1 | O11 <sup>4</sup> | 143.5 (3) |
| O2 | Ho1 | O16 <sup>3</sup> | 136.4 (2) | O5               | Ho1 | O16 <sup>3</sup> | 74.1 (3)  |
| O2 | Ho1 | O17 <sup>3</sup> | 132.9 (3) | O5               | Ho1 | O17 <sup>3</sup> | 75.8 (3)  |
| O3 | Ho1 | O16 <sup>3</sup> | 143.1 (3) | O11 <sup>4</sup> | Ho1 | O1               | 92.5 (3)  |
| O3 | Ho1 | O17 <sup>3</sup> | 132.9 (2) | O11 <sup>4</sup> | Ho1 | O2               | 70.8 (3)  |
| O4 | Ho1 | O1               | 154.5 (3) | O11 <sup>4</sup> | Ho1 | O3               | 142.4 (3) |
| O4 | Ho1 | O2               | 87.6 (3)  | O11 <sup>4</sup> | Ho1 | O4               | 96.7 (3)  |
| O4 | Ho1 | O3               | 79.7 (3)  | O11 <sup>4</sup> | Ho1 | O16 <sup>3</sup> | 70.0 (3)  |
| O4 | Ho1 | O16 <sup>3</sup> | 78.7 (3)  | O11 <sup>4</sup> | Ho1 | O17 <sup>3</sup> | 77.2 (3)  |
| O4 | Ho1 | O17 <sup>3</sup> | 130.5 (3) | O17 <sup>3</sup> | Ho1 | O16 <sup>3</sup> | 52.7 (2)  |

**Compound 7**

|    |     |                  |           |                  |     |                  |           |
|----|-----|------------------|-----------|------------------|-----|------------------|-----------|
| O1 | Er1 | O2               | 74.0 (3)  | O4               | Er1 | O6               | 133.5 (3) |
| O1 | Er1 | O3               | 83.2 (3)  | O6               | Er1 | O2               | 133.1 (3) |
| O1 | Er1 | O4               | 144.9 (3) | O6               | Er1 | O5               | 52.6 (2)  |
| O1 | Er1 | O5               | 73.9 (3)  | O11 <sup>6</sup> | Er1 | O1               | 142.8 (3) |
| O1 | Er1 | O6               | 75.6 (3)  | O11 <sup>6</sup> | Er1 | O2               | 142.8 (3) |
| O1 | Er1 | O12 <sup>5</sup> | 103.2 (3) | O11 <sup>6</sup> | Er1 | O3               | 96.5 (3)  |
| O2 | Er1 | O5               | 143.1 (3) | O11 <sup>6</sup> | Er1 | O4               | 71.7 (3)  |
| O3 | Er1 | O2               | 79.8 (3)  | O11 <sup>6</sup> | Er1 | O5               | 69.6 (3)  |
| O3 | Er1 | O4               | 86.8 (3)  | O11 <sup>6</sup> | Er1 | O6               | 76.7 (3)  |
| O3 | Er1 | O5               | 78.8 (3)  | O11 <sup>6</sup> | Er1 | O12 <sup>5</sup> | 93.0 (3)  |
| O3 | Er1 | O6               | 130.5 (3) | O12 <sup>5</sup> | Er1 | O2               | 78.4 (3)  |
| O3 | Er1 | O12 <sup>5</sup> | 154.5 (3) | O12 <sup>5</sup> | Er1 | O4               | 73.8 (3)  |
| O4 | Er1 | O2               | 71.1 (3)  | O12 <sup>5</sup> | Er1 | O5               | 126.6 (3) |
| O4 | Er1 | O5               | 136.7 (3) | O12 <sup>5</sup> | Er1 | O6               | 74.7 (3)  |
